# Supplementary material
Source: PubMed Central journal article supplement (PMC2766574)
Supplement: NIHMS152091-supplement-supplement_1.pdf [file NIHMS152091-supplement-supplement_1.pdf]

- monocytic THP-1 cells under growth factor deprivation via extracellular signal-regulated kinase-dependent expression of p21 Cip/WAF1. *Infect Immun* **69**: 4944–4950.
- Perez-Chaparro, P.J., Gracieux, P., Lafaurie, G.I., Donnio, P.Y., and Bonnaure-Mallet, M. (2008) Genotypic characterization of *Porphyromonas gingivalis* isolated from subgingival plaque and blood sample in positive bacteremia subjects with periodontitis. *J Clin Periodontol* **35**: 748–753.
- Renaud, S.J., Postovit, L.M., Macdonald-Goodfellow, S.K., McDonald, G.T., Caldwell, J.D., and Graham, C.H. (2005) Activated macrophages inhibit human cytotrophoblast invasiveness *in vitro*. *Biol Reprod* **73**: 237–243.
- Sarfaraz, S., Afaq, F., Adhami, V.M., Malik, A., and Mukhtar, H. (2006) Cannabinoid receptor agonist-induced apoptosis of human prostate cancer cells LNCaP proceeds through sustained activation of ERK1/2 leading to G1 cell cycle arrest. *J Biol Chem* **281**: 39480–39491.
- Schloesser, R.L., Schaefer, V., and Groll, A.H. (2004) Fatal transplacental infection with non-typhoidal *Salmonella*. *Scand J Infect Dis* **36**: 773–774.
- Sheets, S.M., Potempa, J., Travis, J., Fletcher, H.M., and Casiano, C.A. (2006) Gingipains from *Porphyromonas gingivalis* W83 synergistically disrupt endothelial cell adhesion and can induce caspase-independent apoptosis. *Infect Immun* **74**: 5667–5678.
- Slaney, J.M., Gallagher, A., Aduse-Opoku, J., Pell, K., and Curtis, M.A. (2006) Mechanisms of resistance of *Porphyromonas gingivalis* to killing by serum complement. *Infect Immun* **74**: 5352–5361.
- Stagno, S., Pass, R.F., Cloud, G., Britt, W.J., Henderson, R.E., Walton, P.D., et al. (1986) Primary cytomegalovirus infection in pregnancy. Incidence, transmission to fetus, and clinical outcome. *JAMA* **256**: 1904–1908.
- Straszewski-Chavez, S.L., Abrahams, V.M., and Mor, G. (2005) The role of apoptosis in the regulation of trophoblast survival and differentiation during pregnancy. *Endocr Rev* **26**: 877–897.
- Sun, A., Bagella, L., Tutton, S., Romano, G., and Giordano, A. (2007) From G0 to S phase: a view of the roles played by the retinoblastoma (Rb) family members in the Rb-E2F pathway. *J Cell Biochem* **102**: 1400–1404.
- Svinarich, D.M., Bitonti, O.M., Romero, R., and Gonik, B. (1996) Induction and posttranslational expression of cytokines in a first-trimester trophoblast cell line by lipopolysaccharide. *Am J Obstet Gynecol* **175**: 970–973.
- Svinarich, D.M., DiCerbo, J.A., Zaher, F.M., Yelian, F.D., and Gonik, B. (1998) Ethanol-induced expression of cytokines in a first-trimester trophoblast cell line. *Am J Obstet Gynecol* **179**: 470–475.
- Tribble, G.D., Mao, S., James, C.E., and Lamont, R.J. (2006) A *Porphyromonas gingivalis* haloacid dehalogenase family phosphatase interacts with human phosphoproteins and is important for invasion. *Proc Natl Acad Sci USA* **103**: 11027–11032.
- Watanabe, K., Yilmaz, O., Nakhjiri, S.F., Belton, C.M., and Lamont, R.J. (2001) Association of mitogen-activated protein kinase pathways with gingival epithelial cell responses to *Porphyromonas gingivalis* infection. *Infect Immun* **69**: 6731–6737.
- Wimmer, G., and Pihlstrom, B.L. (2008) A critical assessment of adverse pregnancy outcome and periodontal disease. *J Clin Periodontol* **35**: 380–397.
- Xiong, X., Buekens, P., Fraser, W.D., Beck, J., and Offenbacher, S. (2006) Periodontal disease and adverse pregnancy outcomes: a systematic review. *BJOG* **113**: 135–143.
- Yilmaz, O., Young, P.A., Lamont, R.J., and Kenny, G.E. (2003) Gingival epithelial cell signalling and cytoskeletal responses to *Porphyromonas gingivalis* invasion. *Microbiology* **149**: 2417–2426.
- Yilmaz, O., Jungas, T., Verbeke, P., and Ojcius, D.M. (2004) Activation of the phosphatidylinositol 3-kinase/Akt pathway contributes to survival of primary epithelial cells infected with the periodontal pathogen *Porphyromonas gingivalis*. *Infect Immun* **72**: 3743–3751.
- Zygmunt, M., McKinnon, T., Herr, F., Lala, P.K., and Han, V.K. (2005) HCG increases trophoblast migration *in vitro* via the insulin-like growth factor-II/mannose-6 phosphate receptor. *Mol Hum Reprod* **11**: 261–267.

### Supporting information

Additional Supporting Information may be found in the online version of this article:

**Fig. S1.** *P. gingivalis* induces G1 arrest in HTR-8 cells. HTR-8 cells were synchronized by (A) starvation, (B) double thymidine block. Cells were infected with *P. gingivalis* at the times and moi indicated. DNA content was analysed by flow cytometry and cell cycle profiles obtained with ModFit software. Data are representative of three independent experiments.

**Fig. S2.** Overexpression of Rb and phospho-Rb prevents *P. gingivalis* induced G1 arrest. HTR-8 cells were transfected with plasmid pRc/CMV/Rb expressing Rb or control pRc/CMV empty vector. Cell cycle distribution of transfected (24 h) cells infected with *P. gingivalis* at an moi 200 for the times indicated was determined by flow cytometry.

Please note: Wiley-Blackwell are not responsible for the content or functionality of any supporting materials supplied by the authors. Any queries (other than missing material) should be directed to the corresponding author for the article.
